# Supplementary material for: Sodium-glucose cotransporter-2 inhibitors improve clinical outcomes in patients with type 2 diabetes mellitus undergoing anthracycline-containing chemotherapy: an emulated target trial using nationwide cohort data in South Korea
Source: PubMed Central journal article supplement (PMC10709414; doi:10.1038/s41598-023-48678-1), 2023-12-08
Supplement: 41598_2023_48678_MOESM1_ESM.pdf [file 41598_2023_48678_MOESM1_ESM.pdf]

[Original Article]

**Sodium-Glucose Cotransporter-2 Inhibitors Improve Clinical Outcomes in Patients  
With Type 2 Diabetes Mellitus Undergoing Anthracycline-Containing Chemotherapy: A  
Nationwide Cohort Study in South Korea**

Hui-Jeong Hwang, Minji Kim, Ji Eun Jun, Dong Keon Yon

**Supplementary Table S1.** Definitions of diagnostic and excluded criteria, comorbidities, medications, and clinical outcomes.

|                                                  | <b>ICD-10-CM code*</b>                          | <b>Diagnostic definition</b>         |
|--------------------------------------------------|-------------------------------------------------|--------------------------------------|
| <b>Inclusion criteria</b>                        |                                                 |                                      |
| Anthracyclines                                   |                                                 | doxorubicin, epirubicin              |
| Cancer type                                      |                                                 |                                      |
| <i>Lymphoma</i>                                  | C81-88                                          |                                      |
| <i>Breast</i>                                    | C50                                             |                                      |
| <i>Genitourinary</i>                             | C51-C68                                         |                                      |
| <i>Other cancers</i>                             | C00-C26, C30-34, C37-38, C40-49, C69-76, C90-97 |                                      |
| <b>Excluded criteria</b>                         |                                                 |                                      |
| Metastasis or unknown-origin cancers             | C39, C77-C80                                    |                                      |
| Prior cardiac arrest                             | I46                                             |                                      |
| Myocardial infarction or ischemic heart diseases | I21-I25                                         |                                      |
| Heart failure or cardiomyopathy                  | I50, I130, I132, I110, I42-I43                  |                                      |
| Valvular heart diseases                          | I34, I35, I38, I39                              |                                      |
| Ventricular arrhythmias                          | I470, I472, I490, I495, I498                    |                                      |
| Atrial flutter/fibrillation                      | I48                                             |                                      |
| Severe lung diseases                             | J4402, J441, J4482, J4492, J4503, J4513, J46    |                                      |
| End-stage renal disease or dialysis              | N181-185, Z49                                   |                                      |
| Liver cirrhosis or hepatic failure               | K72, K74, K702-704, K711                        |                                      |
| Stroke                                           | I60-I64                                         |                                      |
| Type 1 DM                                        | E10                                             |                                      |
| GLP1 RA user                                     |                                                 | exenatide, lixisenatide, dulaglutide |

|                                   |                         |                                                                                                                                                                                  |
|-----------------------------------|-------------------------|----------------------------------------------------------------------------------------------------------------------------------------------------------------------------------|
| <b>DM diagnosis</b>               |                         |                                                                                                                                                                                  |
| Non-DM                            |                         | Neither E10-14 diagnosis code nor hypoglycemic agent use (including insulin, GLP1 RA, and oral hypoglycemic agents)                                                              |
| Type 2 DM                         | E11, E13-14             | diagnosis code plus oral hypoglycemic agents (biguanides, sulfonylureas, glinides, thiazolidinediones, dipeptidyl peptidase-4 inhibitors, alpha- glucosidase inhibitors, SGLT2i) |
| - <i>SGLT2i</i>                   |                         | diagnosis code plus SGLT2i (empagliflozin, dapagliflozin, ipragliflozin, ertugliflozin)                                                                                          |
| - <i>Non-SGLT2i</i>               |                         | diagnosis code plus other oral hypoglycemic agents excluding SGLT2i                                                                                                              |
| - <i>Oral hypoglycemic agents</i> |                         |                                                                                                                                                                                  |
| biguanides                        |                         | metformin                                                                                                                                                                        |
| sulfonylureas                     |                         | glibenclamide, gliclazide, glimepiride                                                                                                                                           |
| glinides                          |                         | nateglinide, repaglinide, mitiglinide                                                                                                                                            |
| thiazolidinediones                |                         | pioglitazone, lobeglitazone                                                                                                                                                      |
| dipeptidyl peptidase-4 inhibitors |                         | alogliptin, anagliptin, evogliptin, gemigliptin, linagliptin, saxagliptin, sitagliptin, teneligliptin, vildagliptin                                                              |
| alpha-glucosidase inhibitors      |                         | acarbose, voglibose, miglitol                                                                                                                                                    |
| <b>Comorbidities</b>              |                         |                                                                                                                                                                                  |
| Hypertension                      | I10, I11, I12, I13, I15 | diagnostic code plus antihypertensive drugs (calcium channel blockers, RAS inhibitors, beta-blockers, thiazide and thiazide-like diuretics)                                      |

|                         |     |                                                                                                                                                                                                                                                                                                   |
|-------------------------|-----|---------------------------------------------------------------------------------------------------------------------------------------------------------------------------------------------------------------------------------------------------------------------------------------------------|
| Dyslipidemia            | E78 | 1) diagnostic code plus drugs including fibrates, omega-3 fatty acids, and nicotinic acid<br>2) statin user                                                                                                                                                                                       |
| Coronary artery disease | I20 |                                                                                                                                                                                                                                                                                                   |
| <b>Medications</b>      |     |                                                                                                                                                                                                                                                                                                   |
| Antithrombotic agents   |     | aspirin, clopidogrel, cilostazol, ticlopidine, prasugrel, ticagrelor, ticlopidine, triflusal, warfarin, enoxaparin, apixaban, dabigatran, edoxaban, rivaroxaban                                                                                                                                   |
| Statins                 |     | atorvastatin, rosuvastatin, simvastatin, fluvastatin, pitavastatin, pravastatin, cerivastatin                                                                                                                                                                                                     |
| RAS inhibitors          |     | alacepril, benazepril, captopril, cilazapril, delapril, enalapril, fosinopril, lisinopril, moexipril, ramipril, imidapril, perindopril, quinapril, spirapril, trandolapril, zofenopril, valsartan, losartan, azilsartan, candesartan, telmisartan, eprosartan, fimasartan, irbesartan, olmesartan |
| Beta-blockers           |     | acebutolol, atenolol, betaxolol, bevantolol, bisoprolol, carteolol, carvedilol, celiprolol, cloranolol, metoprolol, nadolol, nebivolol, pindolol, propranolol, tertatolol                                                                                                                         |
| Alkylating agents       |     | cyclophosphamide, ifosfamide                                                                                                                                                                                                                                                                      |
| Antimicrotubule agents  |     | docetaxel, paclitaxel                                                                                                                                                                                                                                                                             |
| HER2 inhibitors         |     | trastuzumab, pertuzumab, lapatinib, neratinib, dacomitinib, tucatinib                                                                                                                                                                                                                             |

|                             |                             |                                                                                                                                                 |
|-----------------------------|-----------------------------|-------------------------------------------------------------------------------------------------------------------------------------------------|
| VEGF-targeting agents       |                             | aflibercept, bevacizumab, ramucirumab, axitinib, lenvatinib, vandetanib, cabozantinib, regorafenib, sunitinib, vandetanib, sorafenib, pazopanib |
| <b>Clinical outcomes</b>    |                             |                                                                                                                                                 |
| HF hospitalization          | I50, I130, I132, I110, I420 | diagnostic code plus hospitalization plus loop diuretics $\geq 2$ (furosemide, torsemide)                                                       |
| Acute myocardial infarction | I21-I24                     | diagnostic code plus hospitalization plus<br>1) coronary angiography in acute myocardial infarction<br>2) PCI or CABG procedure                 |
| Ischemic stroke             | I63-64                      | diagnostic code plus hospitalization plus brain MRI/CT                                                                                          |

CABG, coronary artery bypass grafting; DM, diabetes mellitus; GLP1 RA, glucagon-like peptide-1 receptor agonist; HER, human epidermal growth factor receptor; HF, heart failure; ICD-10-CM, the International Classification of Disease-10th Revision-Clinical Modification; MRI/CT, magnetic resonance imaging or computed tomography; PCI, percutaneous coronary intervention; RAS, renin-angiotensin system; SGLT2i; sodium-glucose cotransporter-2 inhibitors; VEGF, vascular endothelial growth factor.  
\*Admission  $\geq 1$  or outpatient department  $\geq 2$ .

**Supplementary Table S2.** Administered chemotherapy between groups in the propensity score-matched cohorts

| Variables                  | Non-DM vs. SGLT2i (cohort 1) |             |            | Non-SGLT2i vs. SGLT2i (cohort 2) |             |            |
|----------------------------|------------------------------|-------------|------------|----------------------------------|-------------|------------|
|                            | Non-DM                       | SGLT2i      | <i>SMD</i> | Non-SGLT2i                       | SGLT2i      | <i>SMD</i> |
| <b>Chemotherapy, n (%)</b> |                              |             |            |                                  |             |            |
| High-dose ACs              | 2024 (25.95)                 | 208 (26.67) | 0.0163     | 614 (26.24)                      | 208 (26.67) | 0.0097     |
| Alkylating agents          | 338 (4.33)                   | 21 (2.69)   | -0.0892    | 79 (3.38)                        | 21 (2.69)   | -0.0399    |
| Antimicrotubule agents     | 2922 (37.46)                 | 306 (39.23) | 0.0364     | 939 (40.13)                      | 306 (39.23) | -0.0183    |
| HER2 inhibitors            | 927 (11.88)                  | 91 (11.67)  | -0.0068    | 291 (12.44)                      | 91 (11.67)  | -0.0236    |
| VEGF-targeting agents      | 253 (3.24)                   | 27 (3.46)   | 0.0121     | 103 (4.40)                       | 27 (3.46)   | -0.0484    |

AC, anthracycline; DM, diabetes mellitus; HER, human epidermal growth factor receptor; SGLT2i; sodium-glucose cotransporter-2 inhibitor; SMD, standardized mean difference; VEGF, vascular endothelial growth factor.

**Supplementary Table S3.** Hazard ratios for the 1-year composite outcome in the propensity score-matched cohorts

| <b>Clinical outcomes</b>                                                      | <b>Non-DM vs. SGLT2i (cohort 1)</b> |                    | <b>Non-SGLT2i vs. SGLT2i (cohort 2)</b> |                    |
|-------------------------------------------------------------------------------|-------------------------------------|--------------------|-----------------------------------------|--------------------|
|                                                                               | Non-DM                              | SGLT2i             | Non-SGLT2i                              | SGLT2i             |
| <b>Composite outcome = HF hospitalization + AMI + Ischemic stroke + Death</b> |                                     |                    |                                         |                    |
| <i>Crude HR (95% CI)</i>                                                      | 1.0 (ref)                           | 0.44 (0.27 – 0.70) | 1.0 (ref)                               | 0.44 (0.27 – 0.72) |
| <i>Adjusted HR (95% CI)</i>                                                   | 1.0 (ref)                           | 0.41 (0.26 – 0.66) | 1.0 (ref)                               | 0.40 (0.25 – 0.67) |

AMI, acute myocardial infarction; CI, confidence interval; DM, diabetes mellitus; HF, heart failure; HR, hazard ratio; SGLT2i, sodium-glucose cotransporter-2 inhibitor.
